# Supplementary material for: Telemonitoring of Real-World Health Data in Cardiology: A Systematic Review
Source: Preprints.org preprint supplement (doi:10.20944/preprints202107.0702.v1), 2021-07-30
Supplement: Supplementary file 1 [file supplementary]

## Sheet: Export
Titel	Author, editor or institution	Year	Subtitle	Documenttype	Journal	DOI	Volume	Nummer	Date	Page from until
Effectiveness of a smartphone application to promote physical activity in primary care	Glynn, Liam G.; Hayes, Patrick S.; Casey, Monica; Glynn, Fergus; Alvarez-Iglesias, Alberto; Newell, John; OLaighin, Gearóid; Heaney, David; O'Donnell, Martin; Murphy, Andrew W.	2014	The SMART MOVE randomised controlled trial	Zeitschriftenaufsatz	Br J Gen Pract (The British Journal of General Practice: The Journal of the Royal College of General Practitioners)	10.3399/bjgp14X680461	64	624	2014/07	e384-391
Intelligent mobile support for therapy adherence and behavior change	Klein, Michel; Mogles, Nataliya; van Wissen, Arlette	2014		Zeitschriftenaufsatz	J Biomed Inform (Journal of Biomedical Informatics)	10.1016/j.jbi.2014.05.005	51		2014/10	137–151
Making an APPropriate Care Program for Indigenous Cardiac Disease	Bradford, DanaKai; Hansen, David; Karunanithi, Mohan	2015	Customization of an Existing Cardiac Rehabilitation Program	Zeitschriftenaufsatz	Stud Health Technol Inform (Studies in Health Technology and Informatics)		216		2015	343–347
Accuracy and Usability of a Self-Administered 6-Minute Walk Test Smartphone Application	Brooks, Gabriel C.; Vittinghoff, Eric; Iyer, Sivaraman; Tandon, Damini; Kuhar, Peter; Madsen, Kristine A.; Marcus, Gregory M.; Pletcher, Mark J.; Olgin, Jeffrey E.	2015		Zeitschriftenaufsatz	Circ Heart Fail (Circulation. Heart Failure)	10.1161/CIRCHEARTFAILURE.115.002062	8	5	2015/09	905–913
Design and Implementation of a Telecardiology System for Mobile Devices	Cinaglia, Pietro; Tradigo, Giuseppe; Guzzi, Pietro H.; Veltri, Pierangelo	2015		Zeitschriftenaufsatz	Interdiscip Sci (Interdisciplinary Sciences, Computational Life Sciences)		7	3	2015/09	266–274
Mobile App to Reduce Inactivity in Sedentary Overweight Women	Finkelstein, Joseph; Bedra, McKenzie; Li, Xuan; Wood, Jeffrey; Ouyang, Pamela	2015		Zeitschriftenaufsatz	Stud Health Technol Inform (Studies in Health Technology and Informatics)		216		2015	89–92
Adaptive intervention design in mobile health	Lin, Pao-Hwa; Intille, Stephen; Bennett, Gary; Bosworth, Hayden B.; Corsino, Leonor; Voils, Corrine; Grambow, Steven; Lazenka, Tony; Batch, Bryan C.; Tyson, Crystal; Svetkey, Laura P.	2015	Intervention design and development in the Cell Phone Intervention for You trial	Zeitschriftenaufsatz	Clin Trials (Clinical Trials (London, England))	10.1177/1740774515597222	12	6	2015/12	634–645
Disseminating cardiovascular disease risk assessment with a PAHO mobile app	Ordúñez, Pedro; Tajer, Carlos	2015	A public eHealth intervention	Zeitschriftenaufsatz	Rev Panam Salud Publica (Revista Panamericana De Salud Publica = Pan American Journal of Public Health)		38	1	2015/07	82–85
Engineering a mobile health tool for resource-poor settings to assess and manage cardiovascular disease risk	Raghu, Arvind; Praveen, Devarsetty; Peiris, David; Tarassenko, Lionel; Clifford, Gari	2015	SMARThealth study	Zeitschriftenaufsatz	BMC Med Inform Decis Mak (BMC medical informatics and decision making)	10.1186/s12911-015-0148-4	15		2015/04/29	36
Comparision and analysis of top 10 exercise android Apps in mainland China	Wang, Yanling; Sun, Liu; Xu, Yahong; Xiao, Qian; Chang, Polun; Wu, Ying	2015		Zeitschriftenaufsatz	Stud Health Technol Inform (Studies in Health Technology and Informatics)		216		2015	1024
Development of a mobile phone-based intervention to improve adherence to secondary prevention of coronary heart disease in China	Chen, Shu; Gong, Enying; Kazi, Dhruv S.; Gates, Ann B.; Karaye, Kamilu Musa; Girerd, Nicolas; Bai, Rong; AlHabib, Khalid F.; Li, Chaoyun; Sun, Kelly; Hong, Louisa; Fu, Hua; Peng, Weixia; Liu, Xianxia; Chen, Lei; Schwalm, J.-D.; Yan, Lijing L.	2016		Zeitschriftenaufsatz	J Med Eng Technol (Journal of Medical Engineering & Technology)	10.1080/03091902.2016.1213904	40	7-8	2016/11//Oct - undefined	372–382
mHealth in Cardiovascular Health Care	Chow, Clara K.; Ariyarathna, Nilshan; Islam, Sheikh Mohammed Shariful; Thiagalingam, Aravinda; Redfern, Julie	2016		Zeitschriftenaufsatz	Heart Lung Circ (Heart, Lung & Circulation)	10.1016/j.hlc.2016.04.009	25	8	2016/08	802–807
The Top Chinese Mobile Health Apps	Hsu, Jeffrey; Di Liu; Yu, Ya Min; Zhao, Hui Tong; Chen, Zhi Rou; Li, Jiao; Chen, Wei	2016	A Systematic Investigation	Zeitschriftenaufsatz	J Med Internet Res (Journal of Medical Internet Research)	10.2196/jmir.5955	18	8	2016/08/29	e222
Quality of Chinese CVD Medication Apps	Liu, Yisi; Chang, Polun; Li, Nan; Lamb, Karen V.; Wang, Jiani; Huang, Xiuxiu; Wang, Yi; Wu, Ying	2016		Zeitschriftenaufsatz	Stud Health Technol Inform (Studies in Health Technology and Informatics)		225		2016	1036–1037
Development of an integrated e-health tool for people with, or at high risk of, cardiovascular disease	Neubeck, Lis; Coorey, Genevieve; Peiris, David; Mulley, John; Heeley, Emma; Hersch, Fred; Redfern, Julie	2016	The Consumer Navigation of Electronic Cardiovascular Tools (CONNECT) web application	Zeitschriftenaufsatz	Int. J. Med. Inform. (International Journal of Medical Informatics)	10.1016/j.ijmedinf.2016.01.009	96		2016/12	24–37
Mobile health in cardiology	Treskes, Roderick Willem; van der Velde, Enno Tjeerd; Barendse, Rogier; Bruining, Nico	2016	A review of currently available medical apps and equipment for remote monitoring	Zeitschriftenaufsatz	Expert Rev Med Devices (Expert Review of Medical Devices)	10.1080/17434440.2016.1218277	13	9	2016/09	823–830
The Effectiveness of Self-Management Mobile Phone and Tablet Apps in Long-term Condition Management	Whitehead, Lisa; Seaton, Philippa	2016	A Systematic Review	Zeitschriftenaufsatz	J Med Internet Res (Journal of Medical Internet Research)	10.2196/jmir.4883	18	5	2016/05/16	e97
Accuracy of smartphone apps for heart rate measurement	Coppetti, Thomas; Brauchlin, Andreas; Müggler, Simon; Attinger-Toller, Adrian; Templin, Christian; Schönrath, Felix; Hellermann, Jens; Lüscher, Thomas F.; Biaggi, Patric; Wyss, Christophe A.	2017		Zeitschriftenaufsatz	Eur J Prev Cardiol (European Journal of Preventive Cardiology)	10.1177/2047487317702044	24	12	2017/08	1287–1293
A salt-reduction smartphone app supports lower-salt food purchases for people with cardiovascular disease	Eyles, Helen; McLean, Rebecca; Neal, Bruce; Jiang, Yannan; Doughty, Robert N.; McLean, Rachael; Ni Mhurchu, Cliona	2017	Findings from the SaltSwitch randomised controlled trial	Zeitschriftenaufsatz	Eur J Prev Cardiol (European Journal of Preventive Cardiology)	10.1177/2047487317715713	24	13	2017/09	1435–1444
Protocol for the mWellcare trial	Jha, Dilip; Gupta, Priti; Ajay, Vamadevan S.; Jindal, Devraj; Perel, Pablo; Prieto-Merino, David; Jacob, Pramod; Nyong, Jonathan; Venugopal, Vidya; Singh, Kavita; Goenka, Shifalika; Roy, Ambuj; Tandon, Nikhil; Patel, Vikram; Prabhakaran, Dorairaj	2017	A multicentre, cluster randomised, 12-month, controlled trial to compare the effectiveness of mWellcare, an mHealth system for an integrated management of patients with hypertension and diabetes, versus enhanced usual care in India	Zeitschriftenaufsatz	BMJ Open (BMJ open)	10.1136/bmjopen-2016-014851	7	8	2017/08/11	e014851
Mobile Application "Neurogame" for Assessment the Attention, Focus and Concentration	Loleski, Mario; Loleska, Sofija; Pop-Jordanova, Nada	2017		Zeitschriftenaufsatz	Pril (Makedon Akad Nauk Umet Odd Med Nauki) (Prilozi (Makedonska Akademija Na Naukite I Umetnostite. Oddelenie Za Medicinski Nauki))	10.2478/prilozi-2018-0006	38	3	2017/12/01	55–62
Development of a Smartphone App for Visualizing Heart Sounds and Murmurs	Mamorita, Noritaka; Arisaka, Naoya; Isonaka, Risa; Kawakami, Tadashi; Takeuchi, Akihiro	2017		Zeitschriftenaufsatz	Cardiology (Cardiology)	10.1159/000466683	137	3	2017	193–200
Feasibility of Obtaining Measures of Lifestyle From a Smartphone App	McConnell, Michael V.; Shcherbina, Anna; Pavlovic, Aleksandra; Homburger, Julian R.; Goldfeder, Rachel L.; Waggot, Daryl; Cho, Mildred K.; Rosenberger, Mary E.; Haskell, William L.; Myers, Jonathan; Champagne, Mary Ann; Mignot, Emmanuel; Landray, Martin; Tarassenko, Lionel; Harrington, Robert A.; Yeung, Alan C.; Ashley, Euan A.	2017	The MyHeart Counts Cardiovascular Health Study	Zeitschriftenaufsatz	JAMA Cardiol (JAMA cardiology)	10.1001/jamacardio.2016.4395	2	1	2017/01/01	67–76
Rationale and design of the Medication adherence Improvement Support App For Engagement-Blood Pressure (MedISAFE-BP) trial	Morawski, Kyle; Ghazinouri, Roya; Krumme, Alexis; McDonough, Julianne; Durfee, Erin; Oley, Leslie; Mohta, Namita; Juusola, Jessie; Choudhry, Niteesh K.	2017		Zeitschriftenaufsatz	Am Heart J (American Heart Journal)	10.1016/j.ahj.2016.11.007	186		2017/04	40–47
Smartphone-Based Geofencing to Ascertain Hospitalizations	Nguyen, Kaylin T.; Olgin, Jeffrey E.; Pletcher, Mark J.; Ng, Madelena; Kaye, Leanne; Moturu, Sai; Gladstone, Rachel A.; Malladi, Chaitanya; Fann, Amy H.; Maguire, Carol; Bettencourt, Laura; Christensen, Matthew A.; Marcus, Gregory M.	2017		Zeitschriftenaufsatz	Circ Cardiovasc Qual Outcomes (Circulation. Cardiovascular Quality and Outcomes)	10.1161/CIRCOUTCOMES.116.003326	10	3	2017/03
Direct Adherence Measurement Using an Ingestible Sensor Compared With Self-Reporting in High-Risk Cardiovascular Disease Patients Who Knew They Were Being Measured	Thompson, David; Mackay, Teresa; Matthews, Maria; Edwards, Judith; Peters, Nicholas S.; Connolly, Susan B.	2017	A Prospective Intervention	Zeitschriftenaufsatz	JMIR Mhealth Uhealth (JMIR mHealth and uHealth)	10.2196/mhealth.6998	5	6	2017/06/12	e76
PD_Manager	Tsiouris, Kostas M.; Gatsios, Dimitrios; Rigas, George; Miljkovic, Dragana; Koroušić Seljak, Barbara; Bohanec, Marko; Arredondo, Maria T.; Antonini, Angelo; Konitsiotis, Spyros; Koutsouris, Dimitrios D.; Fotiadis, Dimitrios I.	2017	An mHealth platform for Parkinson's disease patient management	Zeitschriftenaufsatz	Healthc Technol Lett (Healthcare Technology Letters)	10.1049/htl.2017.0007	4	3	2017/06	102–108
Current Status of Cardiovascular Disease-Related Smartphone Apps Downloadable in China	Xiao, Qian; Lu, Sai; Wang, Yanling; Sun, Liu; Wu, Ying	2017		Zeitschriftenaufsatz	Telemed J E Health (Telemedicine Journal and E-Health: The Official Journal of the American Telemedicine Association)	10.1089/tmj.2016.0083	23	3	2017/03	219–225
Preferences for Health Information Technologies Among US Adults	Asan, Onur; Cooper Ii, Farion; Nagavally, Sneha; Walker, Rebekah J.; Williams, Joni S.; Ozieh, Mukoso N.; Egede, Leonard E.	2018	Analysis of the Health Information National Trends Survey	Zeitschriftenaufsatz	J Med Internet Res (Journal of Medical Internet Research)	10.2196/jmir.9436	20	10	2018/10/18	e277
MedFit App, a Behavior-Changing, Theoretically Informed Mobile App for Patient Self-Management of Cardiovascular Disease	Duff, Orlaith; Walsh, Deirdre; Malone, Shauna; McDermott, Lauri; Furlong, Brona; O'Connor, Noel; Moran, Kieran; Woods, Catherine	2018	User-Centered Development	Zeitschriftenaufsatz	JMIR Form Res (JMIR formative research)	10.2196/formative.9550	2	1	2018/04/27	e8
European Society of Cardiology smartphone and tablet applications for patients with atrial fibrillation and their health care providers	Kotecha, Dipak; Chua, Winnie W. L.; Fabritz, Larissa; Hendriks, Jeroen; Casadei, Barbara; Schotten, Ulrich; Vardas, Panos; Heidbuchel, Hein; Dean, Veronica; Kirchhof, Paulus; European Society of Cardiology Atrial Fibrillation Guidelines Taskforce, the CATCH ME consortium and the European Heart Rhythm Association	2018		Zeitschriftenaufsatz	Europace (Europace: European Pacing, Arrhythmias, and Cardiac Electrophysiology: Journal of the Working Groups on Cardiac Pacing, Arrhythmias, and Cardiac Cellular Electrophysiology of the European Society of Cardiology)	10.1093/europace/eux299	20	2	2018/02/01	225–233
Advanced and Accurate Mobile Health Tracking Devices Record New Cardiac Vital Signs	Modena, Brian D.; Bellahsen, Otmane; Nikzad, Nima; Chieh, Angela; Parikh, Nathan; Dufek, Danielle Marie; Ebner, Gail; Topol, Eric J.; Steinhubl, Steven	2018		Zeitschriftenaufsatz	Hypertension (Hypertension (Dallas, Tex.: 1979))		72	2	2018/08	503–510
Managing Patient-Generated Health Data Through Mobile Personal Health Records	Park, Yu Rang; Lee, Yura; Kim, Ji Young; Kim, Jeonghoon; Kim, Hae Reong; Kim, Young-Hak; Kim, Woo Sung; Lee, Jae-Ho	2018	Analysis of Usage Data	Zeitschriftenaufsatz	JMIR Mhealth Uhealth (JMIR mHealth and uHealth)	10.2196/mhealth.9620	6	4	2018/04/09	e89
A Flexible 12-Lead/Holter Device with Compression Capabilities for Low-Bandwidth Mobile-ECG Telemedicine Applications	Pineda-López, Flavio; Martínez-Fernández, Andrés; Rojo-Álvarez, José Luis; García-Alberola, Arcadi; Blanco-Velasco, Manuel	2018		Zeitschriftenaufsatz	Sensors (Basel) (Sensors (Basel, Switzerland))	10.3390/s18113773	18	11	2018/11/05
Trends in user ratings and reviews of a popular yet inaccurate blood pressure-measuring smartphone app	Plante, Timothy B.; O'Kelly, Anna C.; Macfarlane, Zane T.; Urrea, Bruno; Appel, Lawrence J.; Miller Iii, Edgar R.; Blumenthal, Roger S.; Martin, Seth S.	2018		Zeitschriftenaufsatz	J Am Med Inform Assoc (Journal of the American Medical Informatics Association: JAMIA)	10.1093/jamia/ocy060	25	8	2018/08/01	1074–1079
Mobile health apps preferences and practice among ambulatory cardiovascular patients	Reddy, Rajesh; Majmudar, Maulik; Dhopeshwarkar, Neil; Vacaro, Victoria; Isselbacher, Eric; Bhatt, Ami B.	2018		Zeitschriftenaufsatz	Future Cardiol (Future Cardiology)	10.2217/fca-2018-0005	14	5	2018/09	381–388
YORwalK	Shalan, Ahmed; Abdulrahman, Abubakar; Habli, Ibrahim; Tew, Garry; Thompson, Andrew	2018	Desiging a Smartphone Exercise Application for People with Intermittent Claudication	Zeitschriftenaufsatz	Stud Health Technol Inform (Studies in Health Technology and Informatics)		247		2018	311–315
Mobile health applications for atrial fibrillation	Ayyaswami, Varun; Padmanabhan, Divya L.; Crihalmeanu, Tudor; Thelmo, Franklin; Prabhu, Arpan V.; Magnani, Jared W.	2019	A readability and quality assessment	Zeitschriftenaufsatz	Int J Cardiol (International Journal of Cardiology)	10.1016/j.ijcard.2019.07.026	293		2019/10/15	288–293
Improving Cardiovascular Health Among African-Americans Through Mobile Health	Brewer, LaPrincess C.; Hayes, Sharonne N.; Jenkins, Sarah M.; Lackore, Kandace A.; Breitkopf, Carmen Radecki; Cooper, Lisa A.; Patten, Christi A.	2019	The FAITH! App Pilot Study	Zeitschriftenaufsatz	J Gen Intern Med (Journal of General Internal Medicine)	10.1007/s11606-019-04936-5	34	8	2019/08	1376–1378
Image-Based Mobile System for Dietary Management in an American Cardiology Population	Choi, Brian G.; Dhawan, Tania; Metzger, Kelli; Marshall, Lorraine; Akbar, Awdah; Jain, Tushina; Young, Heather A.; Katz, Richard J.	2019	Pilot Randomized Controlled Trial to Assess the Efficacy of Dietary Coaching Delivered via a Smartphone App Versus Traditional Counseling	Zeitschriftenaufsatz	JMIR Mhealth Uhealth (JMIR mHealth and uHealth)	10.2196/10755	7	4	2019/04/23	e10755
Swiss-Meds	Ehrler, Frederic; Gschwind, Liliane; Meyer, Philippe; Blondon, Katherine	2019	An App Fostering Medication Adherence of Swiss Patient	Zeitschriftenaufsatz	Stud Health Technol Inform (Studies in Health Technology and Informatics)		259		2019	71–76
Effect of a lifestyle-focused electronic patient support application for improving risk factor management, self-rated health, and prognosis in post-myocardial infarction patients	Gonzalez, Manuel; Sjölin, Ingela; Bäck, Maria; Ögmundsdottir Michelsen, Halldora; Tanha, Tina; Sandberg, Camilla; Schiopu, Alexandru; Leosdottir, Margret	2019	Study protocol for a multi-center randomized controlled trial	Zeitschriftenaufsatz	Trials (Trials)	10.1186/s13063-018-3118-1	20	1	2019/01/24	76
A Hospital-Community-Family-Based Telehealth Program for Patients With Chronic Heart Failure	Guo, Xiaorong; Gu, Xiang; Jiang, Jiang; Li, Hongxiao; Duan, Ruoyu; Zhang, Yi; Sun, Lei; Bao, Zhengyu; Shen, Jianhua; Chen, Fukun	2019	Single-Arm, Prospective Feasibility Study	Zeitschriftenaufsatz	JMIR Mhealth Uhealth (JMIR mHealth and uHealth)		7	12	2019/12/13	e13229
Mobile Health (mHealth) technology for improved screening, patient involvement and optimising integrated care in atrial fibrillation	Guo, Yutao; Lane, Deirdre A.; Wang, Liming; Chen, Yundai; Lip, Gregory Y. H.; Investigators, mAF-App Trial [II]	2019	The mAFA (mAF-App) II randomised trial	Zeitschriftenaufsatz	Int J Clin Pract (International Journal of Clinical Practice)	10.1111/ijcp.13352	73	7	2019/07	e13352
Mobile Photoplethysmographic Technology to Detect Atrial Fibrillation	Guo, Yutao; Wang, Hao; Zhang, Hui; Liu, Tong; Liang, Zhaoguang; Xia, Yunlong; Yan, Li; Xing, Yunli; Shi, Haili; Li, Shuyan; Liu, Yanxia; Liu, Fan; Feng, Mei; Chen, Yundai; Lip, Gregory Y. H.; Investigators, MAFA [II]	2019		Zeitschriftenaufsatz	J Am Coll Cardiol (Journal of the American College of Cardiology)	10.1016/j.jacc.2019.08.019	74	19	2019/11/12	2365–2375
Preparing India to Leverage Power of Mobile Technology	Jain, Yojna Sah; Garg, Arun; Jhamb, D. K.; Jain, Praful; Karar, Akash	2019	Development of a Bilingual Mobile Health Tool for Heart Patients	Zeitschriftenaufsatz	Cardiovasc Hematol Agents Med Chem (Cardiovascular & Hematological Agents in Medicinal Chemistry)	10.2174/1871525717666190912152938	17	2	2019	125–134
Advances in medical technology and new digital educational platforms	Madrini Junior, Vagner; Cardozo, Francisco Akira Malta; Gomes, Brenno Rizerio; Almeida, Mozar Suzigan de; Scudeler, Thiago Luis; Scarpa, Bruna Romanelli	2019		Zeitschriftenaufsatz	Rev Assoc Med Bras (1992) (Revista Da Associacao Medica Brasileira (1992))	10.1590/1806-9282.65.2.276	65	2	2019/02	276–280
Design and Preliminary Findings From a New Electronic Cohort Embedded in the Framingham Heart Study	McManus, David D.; Trinquart, Ludovic; Benjamin, Emelia J.; Manders, Emily S.; Fusco, Kelsey; Jung, Lindsey S.; Spartano, Nicole L.; Kheterpal, Vik; Nowak, Christopher; Sardana, Mayank; Murabito, Joanne M.	2019		Zeitschriftenaufsatz	J Med Internet Res (Journal of Medical Internet Research)		21	3	2019/03/01	e12143
Clinical Efficacy of Telemedicine Compared to Face-to-Face Clinic Visits for Smoking Cessation	Nomura, Akihiro; Tanigawa, Tomoyuki; Muto, Tomoyasu; Oga, Takafumi; Fukushima, Yasushi; Kiyosue, Arihiro; Miyazaki, Masaki; Hida, Eisuke; Satake, Kohta	2019	Multicenter Open-Label Randomized Controlled Noninferiority Trial	Zeitschriftenaufsatz	J Med Internet Res (Journal of Medical Internet Research)	10.2196/13520	21	4	2019/04/26	e13520
Feasibility and Clinical Relevance of a Mobile Intervention Using TrackPAD to Support Supervised Exercise Therapy in Patients With Peripheral Arterial Disease	Paldán, Katrin; Simanovski, Jan; Ullrich, Greta; Steinmetz, Martin; Rammos, Christos; Jánosi, Rolf Alexander; Moebus, Susanne; Rassaf, Tienush; Lortz, Julia	2019	Study Protocol for a Randomized Controlled Pilot Trial	Zeitschriftenaufsatz	JMIR Res Protoc (JMIR research protocols)	10.2196/13651	8	6	2019/06/26	e13651
Insertable cardiac monitors	Sakhi, Rafi; Theuns, Dominic A. M. J.; Szili-Torok, Tamas; Yap, Sing-Chien	2019	Current indications and devices	Zeitschriftenaufsatz	Expert Rev Med Devices (Expert Review of Medical Devices)	10.1080/17434440.2018.1557046	16	1	2019/01	45–55
Evaluating the Impact of the HeartHab App on Motivation, Physical Activity, Quality of Life, and Risk Factors of Coronary Artery Disease Patients	Sankaran, Supraja; Dendale, Paul; Coninx, Karin	2019	Multidisciplinary Crossover Study	Zeitschriftenaufsatz	JMIR Mhealth Uhealth (JMIR mHealth and uHealth)	10.2196/10874	7	4	2019/04/04	e10874
Medication reminder applications to improve adherence in coronary heart disease	Santo, Karla; Singleton, Anna; Rogers, Kris; Thiagalingam, Aravinda; Chalmers, John; Chow, Clara K.; Redfern, Julie	2019	A randomised clinical trial	Zeitschriftenaufsatz	Heart (Heart (British Cardiac Society))	10.1136/heartjnl-2018-313479	105	4	2019/02	323–329
Technical Guidance for Clinicians Interested in Partnering With Engineers in Mobile Health Development and Evaluation	Shah, Lochan M.; Yang, William E.; Demo, Ryan C.; Lee, Matthias A.; Weng, Daniel; Shan, Rongzi; Wongvibulsin, Shannon; Spaulding, Erin M.; Marvel, Francoise A.; Martin, Seth S.	2019		Zeitschriftenaufsatz	JMIR Mhealth Uhealth (JMIR mHealth and uHealth)	10.2196/14124	7	5	2019/05/15	e14124
Mobile Health Access and Use Among Individuals With or At Risk for Cardiovascular Disease	Shan, Rongzi; Ding, Jie; Plante, Timothy B.; Martin, Seth S.	2019	2018 Health Information National Trends Survey (HINTS)	Zeitschriftenaufsatz	J Am Heart Assoc (Journal of the American Heart Association)	10.1161/JAHA.119.014390	8	24	2019/12/17	e014390
Development and Evaluation of a Mobile Decision Support System for Hypertension Management in the Primary Care Setting in Brazil	Silveira, Daniel Vitório; Marcolino, Milena Soriano; Machado, Elaine Leandro; Ferreira, Camila Gonçalves; Alkmim, Maria Beatriz Moreira; Resende, Elmiro Santos; Carvalho, Bárbara Couto; Antunes, André Pires; Ribeiro, Antonio Luiz Pinho	2019	Mixed-Methods Field Study on Usability, Feasibility, and Utility	Zeitschriftenaufsatz	JMIR Mhealth Uhealth (JMIR mHealth and uHealth)	10.2196/mhealth.9869	7	3	2019/03/25	e9869
Comparing Telemedicine and Face-to-Face Consultation Based on the Standard Smoking Cessation Program for Nicotine Dependence	Tanigawa, Tomoyuki; Nomura, Akihiro; Kuroda, Maki; Muto, Tomoyasu; Hida, Eisuke; Satake, Kohta	2019	Protocol for a Randomized Controlled Trial	Zeitschriftenaufsatz	JMIR Res Protoc (JMIR research protocols)	10.2196/12701	8	7	2019/07/09	e12701
SMARTWOMAN™	Wenger, Nanette K.; Williams, Olubunmi O.; Parashar, Susmita	2019	Feasibility assessment of a smartphone app to control cardiovascular risk factors in vulnerable diabetic women	Zeitschriftenaufsatz	Clin Cardiol (Clinical Cardiology)	10.1002/clc.23124	42	2	2019/02	217–221
Designing meaningful outcome parameters using mobile technology	Werhahn, Stefanie Maria; Dathe, Henning; Rottmann, Thorsten; Franke, Thomas; Vahdat, Dan; Hasenfuß, Gerd; Seidler, Tim	2019	A new mobile application for telemonitoring of patients with heart failure	Zeitschriftenaufsatz	ESC Heart Fail (ESC heart failure)		6	3	2019/06	516–525
Strategies for the Successful Implementation of a Novel iPhone Loaner System (iShare) in mHealth Interventions	Yang, William E.; Spaulding, Erin M.; Lumelsky, David; Hung, George; Huynh, Pauline Phuong; Knowles, Kellen; Marvel, Francoise A.; Vilarino, Valerie; Wang, Jane; Shah, Lochan M.; Xun, Helen; Shan, Rongzi; Wongvibulsin, Shannon; Martin, Seth S.	2019	Prospective Study	Zeitschriftenaufsatz	JMIR Mhealth Uhealth (JMIR mHealth and uHealth)	10.2196/16391	7	12	2019/12/16	e16391
Do mobile device apps designed to support medication adherence demonstrate efficacy? A systematic review of randomised controlled trials, with meta-analysis	Armitage, Laura Catherine; Kassavou, Aikaterini; Sutton, Stephen	2020		Zeitschriftenaufsatz	BMJ Open (BMJ open)	10.1136/bmjopen-2019-032045	10	1	2020/01/30	e032045
Improving Engagement Among Patients With Chronic Cardiometabolic Conditions Using mHealth	Cheikh-Moussa, Kamila; Mira, Jose Joaquin; Orozco-Beltran, Domingo	2020	Critical Review of Reviews	Zeitschriftenaufsatz	JMIR Mhealth Uhealth (JMIR mHealth and uHealth)	10.2196/15446	8	4	2020/04/08	e15446
The EMPOWER-SUSTAIN e-Health Intervention to improve patient activation and self-management behaviours among individuals with Metabolic Syndrome in primary care	Daud, Maryam Hannah; Ramli, Anis Safura; Abdul-Razak, Suraya; Isa, Mohamad Rodi; Yusoff, Fakhrul Hazman; Baharudin, Noorhida; Mohamed-Yassin, Mohamed Syarif; Badlishah-Sham, Siti Fatimah; Nikmat, Azlina Wati; Jamil, Nursuriati; Mohd-Nawawi, Hapizah	2020	Study protocol for a pilot randomised controlled trial	Zeitschriftenaufsatz	Trials (Trials)	10.1186/s13063-020-04237-x	21	1	2020/04/05	311
Development and Assessment of a Mobile Nutritional Counseling Tool for Primary Care Physicians	Gadenz, Sabrina Dalbosco; Harzheim, Erno; Amaral, Herberth Giuliano; Drehmer, Michele	2020		Zeitschriftenaufsatz	Telemed J E Health (Telemedicine Journal and E-Health: The Official Journal of the American Telemedicine Association)	10.1089/tmj.2019.0070	26	6	2020/06	805–811
A Mobile App (mHeart) to Detect Medication Nonadherence in the Heart Transplant Population	Gomis-Pastor, Mar; Roig, Eulalia; Mirabet, Sonia; T De Pourcq, Jan; Conejo, Irene; Feliu, Anna; Brossa, Vicens; Lopez, Laura; Ferrero-Gregori, Andreu; Barata, Anna; Mangues, M. Antonia	2020	Validation Study	Zeitschriftenaufsatz	JMIR Mhealth Uhealth (JMIR mHealth and uHealth)	10.2196/15957	8	2	2020/02/04	e15957
Mobile health technology-supported atrial fibrillation screening and integrated care	Guo, Yutao; Guo, Jun; Shi, Xiangmin; Yao, Yuan; Sun, Yihong; Xia, Yunlong; Yu, Bo; Liu, Tong; Chen, Yundai; Lip, Gregory Y. H.; Investigators, mAF-App Trial [II]	2020	A report from the mAFA-II trial Long-term Extension Cohort	Zeitschriftenaufsatz	Eur J Intern Med (European Journal of Internal Medicine)	10.1016/j.ejim.2020.09.024	82		2020/12	105–111
Mobile Health Technology to Improve Care for Patients With Atrial Fibrillation	Guo, Yutao; Lane, Deirdre A.; Wang, Limin; Zhang, Hui; Wang, Hao; Zhang, Wei; Wen, Jing; Xing, Yunli; Wu, Fang; Xia, Yunlong; Liu, Tong; Wu, Fan; Liang, Zhaoguang; Liu, Fan; Zhao, Yujie; Li, Rong; Li, Xin; Zhang, Lili; Guo, Jun; Burnside, Girvan; Chen, Yundai; Lip, Gregory Y. H.; Investigators, mAF-App Trial [II]	2020		Zeitschriftenaufsatz	J Am Coll Cardiol (Journal of the American College of Cardiology)	10.1016/j.jacc.2020.01.052	75	13	2020/04/07	1523–1534
On-demand mobile health infrastructures to allow comprehensive remote atrial fibrillation and risk factor management through teleconsultation	Hermans, Astrid N. L.; van der Velden, Rachel M. J.; Gawalko, Monika; Verhaert, Dominique V. M.; Desteghe, Lien; Duncker, David; Manninger, Martin; Heidbuchel, Hein; Pisters, Ron; Hemels, Martin; Pison, Laurent; Sohaib, Afzal; Sultan, Arian; Steven, Daniel; Wijtvliet, Petra; Tieleman, Robert; Gupta, Dhiraj; Dobrev, Dobromir; Svennberg, Emma; Crijns, Harry J. G. M.; Pluymaekers, Nikki A. H. A.; He…	2020		Zeitschriftenaufsatz	Clin Cardiol (Clinical Cardiology)	10.1002/clc.23469	43	11	2020/11	1232–1239
How useful is the smartwatch ECG?	Isakadze, Nino; Martin, Seth S.	2020		Zeitschriftenaufsatz	Trends Cardiovasc Med (Trends in Cardiovascular Medicine)	10.1016/j.tcm.2019.10.010	30	7	2020/10	442–448
Efficiency as a determinant of loyalty among users of a Community of Clinical Practice	Lacasta Tintorer, David; Manresa Domínguez, Josep Maria; Jiménez-Zarco, Ana; Rodríguez-Blanco, Teresa; Flayeh Beneyto, Souhel; Torán-Monserrat, Pere; Mundet Tuduri, Xavier; Saigí-Rubió, Francesc	2020	A comparative study between the implementation and consolidation phases	Zeitschriftenaufsatz	BMC Fam Pract (BMC family practice)	10.1186/s12875-020-1081-x	21	1	2020/01/24	15
Comparison of Clinical Outcomes in Patients with ST Elevation Myocardial Infarction with Percutaneous Coronary Intervention and the Use of a Telemedicine App Before and After the COVID-19 Pandemic at a Center in Beijing, China, from August 2019 to March 2020	Nan, Jing; Meng, Shuai; Hu, Hongyu; Jia, Ruofei; Chen, Wei; Li, Qun; Zhang, Tong; Song, Ke; Wang, Yang; Jin, Zening	2020		Zeitschriftenaufsatz	Med Sci Monit (Medical Science Monitor: International Medical Journal of Experimental and Clinical Research)	10.12659/MSM.927061	26		2020/09/17	e927061
Telehealth in chronic disease management and the role of the Internet-of-Medical-Things	Omboni, Stefano; Campolo, Luca; Panzeri, Edoardo	2020	The Tholomeus® experience	Zeitschriftenaufsatz	Expert Rev Med Devices (Expert Review of Medical Devices)	10.1080/17434440.2020.1782734	17	7	2020/07	659–670
Elements of Social Convoy Theory in Mobile Health for Palliative Care	Portz, Jennifer D.; Elsbernd, Kira; Plys, Evan; Ford, Kelsey Lynett; Zhang, Xuhong; Gore, M. Odette; Moore, Susan L.; Zhou, Shuo; Bull, Sheana	2020	Scoping Review	Zeitschriftenaufsatz	JMIR Mhealth Uhealth (JMIR mHealth and uHealth)	10.2196/16060	8	1	2020/01/06	e16060
Home blood pressure monitoring and e-Health	Postel-Vinay, Nicolas; Steichen, Olivier; Pébelier, Emmanuelle; Persu, Alexandre; Berra, Elena; Bobrie, Guillaume; Savard, Sébastien; Nogueria, José; Azizi, Michel	2020	Investigation of patients' experience with the Hy-Result system	Zeitschriftenaufsatz	Blood Press Monit (Blood Pressure Monitoring)	10.1097/MBP.0000000000000436	25	3	2020/06	155–161
Health apps targeting children with overweight-a protocol for a systematic review with meta-analysis and Trial Sequential Analysis of randomised clinical trials	Rashid, Rajeeb; Perego, Paolo; Condon, Laura; Jakobsen, Janus Christian; Lindschou, Jane; Gluud, Christian; Andreoni, Giuseppe; Lissau, Inge	2020		Zeitschriftenaufsatz	Syst Rev (Systematic Reviews)	10.1186/s13643-020-1269-0	9	1	2020/02/11	28
A Mobile Phone-Based Telemonitoring Program for Heart Failure Patients After an Incidence of Acute Decompensation (Medly-AID)	Seto, Emily; Ross, Heather; Tibbles, Alana; Wong, Steven; Ware, Patrick; Etchells, Edward; Kobulnik, Jeremy; Chibber, Tamanna; Poon, Stephanie	2020	Protocol for a Randomized Controlled Trial	Zeitschriftenaufsatz	JMIR Res Protoc (JMIR research protocols)		9	1	2020/01/22	e15753
Covidom, a Telesurveillance Solution for Home Monitoring Patients With COVID-19	Yordanov, Youri; Dechartres, Agnes; Lescure, Xavier; Apra, Caroline; Villie, Pascaline; Marchand-Arvier, Jerome; Debuc, Erwan; Dinh, Aurélien; Jourdain, Patrick; Collaboration, AP-HP /. Universities /. Inserm COVID-19 Research	2020		Zeitschriftenaufsatz	J Med Internet Res (Journal of Medical Internet Research)	10.2196/20748	22	10	2020/10/22	e20748
Feasibility of Atrial Fibrillation Screening With Mobile Health Technologies at Pharmacies	Zaprutko, Tomasz; Zaprutko, Joanna; Baszko, Artur; Sawicka, Dominika; Szałek, Anna; Dymecka, Magdalena; Telec, Wojciech; Kopciuch, Dorota; Ratajczak, Piotr; Michalak, Michał; Rafał, Dankowski; Szyszka, Andrzej; Nowakowska, Elżbieta	2020		Zeitschriftenaufsatz	J Cardiovasc Pharmacol Ther (Journal of Cardiovascular Pharmacology and Therapeutics)	10.1177/1074248419879089	25	2	2020/03	142–151
A Mobile App to Facilitate Socially Distanced Hospital Communication During COVID-19	Anyanwu, Emeka C.; Ward, R. Parker; Shah, Atman; Arora, Vineet; Umscheid, Craig A.	2021	Implementation Experience	Zeitschriftenaufsatz	JMIR Mhealth Uhealth (JMIR mHealth and uHealth)	10.2196/24452	9	2	2021/02/23	e24452
Comparing Smartphone Apps for Traditional Chinese Medicine and Modern Medicine in China	Liu, Xiao Hang; Jin, Fan; Hsu, Jeffrey; Di Li, Nan; Chen, Wei	2021	Systematic Search and Content Analysis	Zeitschriftenaufsatz	JMIR Mhealth Uhealth (JMIR mHealth and uHealth)	10.2196/27406	9	3	2021/03/24	e27406
Implementation of an on-demand app-based heart rate and rhythm monitoring infrastructure for the management of atrial fibrillation through teleconsultation	Pluymaekers, Nikki A. H. A.; Hermans, Astrid N. L.; van der Velden, Rachel M. J.; Gawałko, Monika; den Uijl, Dennis W.; Buskes, Saskia; Vernooy, Kevin; Crijns, Harry J. G. M.; Hendriks, Jeroen M.; Linz, Dominik	2021	TeleCheck-AF	Zeitschriftenaufsatz	Europace (Europace: European Pacing, Arrhythmias, and Cardiac Electrophysiology: Journal of the Working Groups on Cardiac Pacing, Arrhythmias, and Cardiac Cellular Electrophysiology of the European Society of Cardiology)	10.1093/europace/euaa201	23	3	2021/03/08	345–352
Telecardiology	C, Sable; Sable, C.	2001	Potential impact on acute care	Zeitschriftenaufsatz	Critical Care Medicine (Critical Care Medicine)		29	8	2021/04/02/15:09:58	N159-65
Impact of telemedicine on the practice of pediatric cardiology in community hospitals	CA, Sable; SD, Cummings; GD, Pearson; LM, Schratz; RC, Cross; ES, Quivers; H, Rudra; GR, Martin	2002		Zeitschriftenaufsatz	Pediatrics (Pediatrics)	10.1542/peds.109.1.e3	109	1	2021/04/02/15:09:57	7p–7p
Accuracy of analog telephonic stethoscopy for pediatric telecardiology	JM, Belmont; LF, Mattioli	2003		Zeitschriftenaufsatz	Pediatrics (Pediatrics)	10.1542/peds.112.4.780	112	4	2021/04/02/15:09:56	780–786
A cost-effectiveness analysis of interactive paediatric telecardiology	C, Sicotte; P, Lehoux; van N, Doesburg; G, Cardinal; Y, Leblanc	2004		Zeitschriftenaufsatz	Journal of Telemedicine & Telecare (Journal of Telemedicine & Telecare)	10.1258/135763304773391503	10	2	2021/04/02/15:09:54	78–83
Published evidence on the success of telecardiology	D, Hailey; A, Ohinmaa; R, Roine	2004	A mixed record	Zeitschriftenaufsatz	Journal of Telemedicine & Telecare (Journal of Telemedicine & Telecare)		10		2021/04/02/15:09:56	S1:36-8
Nine years' experience of telecardiology in primary care	G, Molinari; A, Valbusa; M, Terrizzano; M, Bazzano; L, Torelli; N, Girardi; A, Barsotti; Molinari, G.; Valbusa, A.; Terrizzano, M.; Bazzano, M.; Torelli, L.; Girardi, N.; Barsotti, A.	2004		Zeitschriftenaufsatz	Journal of Telemedicine & Telecare (Journal of Telemedicine & Telecare)	10.1258/1357633042026297	10	5	2021/04/02/15:09:54	249–253
Paediatric telecardiology services in Queensland	R, Justo; AC, Smith; M, Williams; van der J, Westhuyzen; J, Murray; G, Sciuto; R, Wootton	2004	A review of three years' experience	Zeitschriftenaufsatz	Journal of Telemedicine & Telecare (Journal of Telemedicine & Telecare)		10		2021/04/02/15:09:55	S1:57-60
A pilot study of nurse-led, home-based telecardiology for patients with chronic heart failure	S, Scalvini; E, Zanelli; M, Volterrani; G, Martinelli; D, Baratti; O, Buscaya; P, Baiardo; F, Glisenti; A, Giordano	2004		Zeitschriftenaufsatz	Journal of Telemedicine & Telecare (Journal of Telemedicine & Telecare)	10.1258/135763304773391576	10	2	2021/04/02/15:09:53	113–117
Pre-hospital diagnosis of myocardial ischaemia by telecardiology	B, Schwaab; A, Katalinic; J, Riedel; A, Sheikhzadeh; Schwaab, Bernhard; Katalinic, Alexander; Riedel, Jens; Sheikhzadeh, Abdolhamid	2005	Safety and efficacy of a 12-lead electrocardiogram, recorded and transmitted by the patient	Zeitschriftenaufsatz	Journal of Telemedicine & Telecare (Journal of Telemedicine & Telecare)	10.1258/1357633053430412	11	1	2021/04/02/15:09:57	41–44
Prerecorded telemedicine	Della V, Mea	2005		Zeitschriftenaufsatz	Journal of Telemedicine & Telecare (Journal of Telemedicine & Telecare)	10.1258/1357633054893382	11	5	2021/04/02/15:10:48	276–284
Centenary of tele-electrocardiography and telephonocardiography -- where are we today?	S, Scalvini; F, Glisenti	2005		Zeitschriftenaufsatz	Journal of Telemedicine & Telecare (Journal of Telemedicine & Telecare)	10.1258/135763305774472051	11	7	2021/04/02/15:10:46	325–330
Chronic heart failure home-based management with a telecardiology system	S, Scalvini; E, Zanelli; L, Paletta; M, Benigno; D, Domeneghini; F, Giuli de; A, Giordano; F, Glisenti	2006	A comparison between patients followed by general practitioners and by a cardiology department	Zeitschriftenaufsatz	Journal of Telemedicine & Telecare (Journal of Telemedicine & Telecare)	10.1258/135763306777978461	12	1	2021/04/02/15:10:45	S1:46-8
The diffusion of a medical innovation	SL, Dimmick; KD, Ignatova	2006	Where teleradiology is and where it is going	Zeitschriftenaufsatz	Journal of Telemedicine & Telecare (Journal of Telemedicine & Telecare)		12	1	2021/04/02/15:10:50	S2:51-8
Development of a combined telemedicine and picture archiving and communications system for a tertiary hospital group	B, Crowe; A, Maraj; M, Thatcher; S, Parrish; K, Rogers	2007		Zeitschriftenaufsatz	Journal of Telemedicine & Telecare (Journal of Telemedicine & Telecare)		13		2021/04/02/15:10:48	S3:35-6
Performance evaluation of wavelet-based ECG compression algorithms for telecardiology application over CDMA network	BS, Kim; SK, Yoo	2007		Zeitschriftenaufsatz	Medical Informatics & the Internet in Medicine (Medical Informatics & the Internet in Medicine)	10.1080/14639230701231329	32	3	2021/04/02/15:09:54	177–189
A review of seven years' telecardiology experience	S, Scalvini; M, Mazzù; A, Giordano; E, Zanelli; C, Piemontese; F, Fedele; F, Glisenti	2007		Zeitschriftenaufsatz	Journal of Telemedicine & Telecare (Journal of Telemedicine & Telecare)	10.1258/135763307781644997	13	1	2021/04/02/15:10:48	50–52
Utility of store-and-forward pediatric telecardiology evaluation in distinguishing normal from pathologic pediatric heart sounds	CB, Mahnke; MP, Mulreany; J, Inafuku; M, Abbas; B, Feingold; JA, Paolillo	2008		Zeitschriftenaufsatz	Clinical Pediatrics (Clinical Pediatrics)	10.1177/0009922808320596	47	9	2021/04/02/15:09:53	919–925
Point-of-care testing for cardiac markers	CP, Price	2008	Applications and outcomes	Zeitschriftenaufsatz	Point of Care (Point of Care)		7	4	2021/04/02/15:10:49	261–265
Cost implications of introducing a telecardiology service to support fetal ultrasound screening	R, Dowie; H, Mistry; TA, Young; RC, Franklin; HM, Gardiner; Dowie, Robin; Mistry, Hema; Young, Tracey A.; Franklin, Rodney C. G.; Gardiner, Helena M.	2008		Zeitschriftenaufsatz	Journal of Telemedicine & Telecare (Journal of Telemedicine & Telecare)	10.1258/jtt.2008.080401	14	8	2021/04/02/15:09:58	421–426
The availability of telecardiology consultations and transfer patterns from a remote neonatal intensive care unit	T, Huang; AJ, Moon-Grady; C, Traugott; J, Marcin; Huang, Tannie; Moon-Grady, Anita J.; Traugott, Craig; Marcin, James	2008		Zeitschriftenaufsatz	Journal of Telemedicine & Telecare (Journal of Telemedicine & Telecare)	10.1258/jtt.2008.080102	14	5	2021/04/02/15:09:58	244–248
Advances in remote monitoring of implantable pacemakers, cardioverter defibrillators and cardiac resynchronization therapy systems	W, Jung; A, Rillig; R, Birkemeyer; T, Miljak; U, Meyerfeldt; Jung, Werner; Rillig, Andreas; Birkemeyer, Ralf; Miljak, Tomislav; Meyerfeldt, Udo	2008		Zeitschriftenaufsatz	Journal of Interventional Cardiac Electrophysiology (Journal of Interventional Cardiac Electrophysiology)	10.1007/s10840-008-9311-5	23	1	2021/04/02/15:10:48	73–85
Medical informatics in a united and healthy Europe. Kardionet	J, Sierdzinski; P, Bala; R, Rudowski; M, Grabowski; G, Karpinski; B, Kaczynski; K, Adlassnig; B, Blobel; J, Mantas; I, Masic	2009	Telecardiology based on GRID technology...XXIInd International Congress of the European Federation for Medical Informatics	Zeitschriftenaufsatz	Studies in Health Technology & Informatics (Studies in Health Technology & Informatics)	10.3233/978-1-60750-044-5-463	150		2021/04/02/15:09:57	463–467
Principles and modalities for telecardiology program development	L, Verdier	2009		Zeitschriftenaufsatz	Soins: La Revue de Reference Infirmiere (Soins: La Revue de Reference Infirmiere)			736	2021/04/02/15:09:54	S11-2
A paediatric telecardiology service for district hospitals in south-east England	R, Dowie; H, Mistry; M, Rigby; TA, Young; G, Weatherburn; G, Rowlinson; RC, Franklin	2009	An observational study	Zeitschriftenaufsatz	Archives of Disease in Childhood (Archives of Disease in Childhood)	10.1136/adc.2008.138495	94	4	2021/04/02/15:09:57	273–277
Implementation of a cardiology care program in remote areas in Brazil	Cardoso, C. S.; Ribeiro, A. L. P.; Castro, R. L. V.; César, C. C.; Caiaffa, W. T.	2010	Influence of governability	Zeitschriftenaufsatz	Rural & Remote Health (Rural & Remote Health)		10	3	2021/04/02/15:10:46	1–11
Implementation of a cardiology care program in remote areas in Brazil	CS, Cardoso; ALP, Ribeiro; RLV, Castro; CC, CÃ©sar; WT, Caiaffa	2010	Influence of governability	Zeitschriftenaufsatz	Rural & Remote Health (Rural & Remote Health)		10	3	2021/04/02/15:09:59	1–11
e-Herophilus	Kastania, Anastasia N.; Loudos, Georgios; Sgouros, Nicholas P.; Constantinou, Ioannis; Vavatsioula, Maria; Boudoulas, Harisios; Kossida, Sophia	2010	24-hour personalised telecardiology services	Zeitschriftenaufsatz	International Journal of Electronic Healthcare (International Journal of Electronic Healthcare)	10.1504/IJEH.2010.036206	5	4	2021/04/02/15:09:58	340–354
Telemedicine	S, Gherardi	2010	A practice-based approach to technology	Zeitschriftenaufsatz	Human Relations (Human Relations)	10.1177/0018726709339096	63	4	2021/04/02/15:10:47	501–524
The telecardiology revolution	W, Backman; D, Bendel; R, Rakhit; Backman, Warren; Bendel, Daniel; Rakhit, Roby	2010	Improving the management of cardiac disease in primary care	Zeitschriftenaufsatz	Journal of the Royal Society of Medicine (Journal of the Royal Society of Medicine)	10.1258/jrsm.2010.100301	103	11	2021/04/02/15:09:54	442–446
The physical examination in telecardiology and televascular consultations	Y, Pappas; C, Seale; Pappas, Yannis; Seale, Clive	2010	A study using conversation analysis	Zeitschriftenaufsatz	Patient Education & Counseling (Patient Education & Counseling)	10.1016/j.pec.2010.01.005	81	1	2021/04/02/15:09:58	113–118
A fetal telecardiology service	BA, McCrossan; AJ, Sands; T, Kileen; NN, Doherty; FA, Casey	2012	Patient preference and socio-economic factors	Zeitschriftenaufsatz	Prenatal Diagnosis (Prenatal Diagnosis)	10.1002/pd.3926	32	9	2021/04/02/15:09:55	883–887
Telecardiology through ubiquitous Internet services	C, Costa; JL, Oliveira	2012		Zeitschriftenaufsatz	Int. J. Med. Inform. (International Journal of Medical Informatics)		81	9	2021/04/02/15:10:46	612–621
Comparing drools and ontology reasoning approaches for telecardiology decision support	van Hille, Pascal; Jacques, Julie; Taillard, Julien; Rosier, Arnaud; Delerue, David; Burgun, Anita; Dameron, Olivier	2012		Zeitschriftenaufsatz	Studies in Health Technology & Informatics (Studies in Health Technology & Informatics)		180		2021/04/02/15:10:47	300–304
Telecardiology on Vancouver Island	Horwood, Trent; Aylott, Mya; Loyola, Margarita; Henderson, Jill; Frank, Gary; Fyfe, Mary Lyn	2013	Imagination to Implementation	Zeitschriftenaufsatz	Studies in Health Technology & Informatics (Studies in Health Technology & Informatics)		183		2021/04/02/15:10:47	63–67
Telemedicine and advances in urban and rural healthcare delivery in Africa	Mars, Maurice	2013		Zeitschriftenaufsatz	Progress in Cardiovascular Diseases (Progress in Cardiovascular Diseases)	10.1016/j.pcad.2013.10.006	56	3	2021/04/02/15:09:59	326–335
Costs of remote monitoring vs. ambulatory follow-ups of implanted cardioverter defibrillators in the randomized ECOST study	Guédon-Moreau, Laurence; Lacroix, Dominique; Sadoul, Nicolas; Clémenty, Jacques; Kouakam, Claude; Hermida, Jean-Sylvain; Aliot, Etienne; Kacet, Salem	2014		Zeitschriftenaufsatz	EP: Europace (EP: Europace)	10.1093/europace/euu012	16	8	2021/04/02/15:10:48	1181–1188
Wireless Electrocardiogram Transmission in ISM Band	Gupta, R.; Mitra, M.	2014	An Approach Towards Telecardiology	Zeitschriftenaufsatz	Journal of Medical Systems (Journal of Medical Systems)	10.1007/s10916-014-0090-5	38	10	2021/04/02/15:10:45	1–14
Does the use of structured reporting improve usability? A comparative evaluation of the usability of two approaches for findings reporting in a large-scale telecardiology context	Lacerda, Thaisa Cardoso; Wangenheim, Christiane Gresse von; Wangenheim, Aldo von; Giuliano, Isabela	2014		Zeitschriftenaufsatz	J Biomed Inform (Journal of Biomedical Informatics)	10.1016/j.jbi.2014.07.002	52		2021/04/02/15:10:45	222–230
Survey of paediatricians' opinions on a regional paediatric telecardiology service	McCrossan, Brian A.; Doherty, Nicola N.; Sands, Andrew J.; Grant, Brian; Craig, Brian G.; McCusker, Chris G.; Casey, Frank A.	2014		Zeitschriftenaufsatz	Journal of Paediatrics & Child Health (Journal of Paediatrics & Child Health)	10.1111/jpc.12501	50	6	2021/04/02/15:09:55	482–486
GUEST EDITORIAL. Physician liability issues and telemedicine	Kmucha, Steven T.	2015	Part 1 of 3	Zeitschriftenaufsatz	ENT: Ear, Nose & Throat Journal (ENT: Ear, Nose & Throat Journal)		94	10/11	2021/04/02/15:10:49	428–429
The impact of telemedicine in cardiac critical care	Raikhelkar, Jayashree; Raikhelkar, Jayant K.	2015		Zeitschriftenaufsatz	Critical Care Clinics (Critical Care Clinics)	10.1016/j.ccc.2014.12.008	31	2	2021/04/02/15:10:45	305–317
Remote Monitoring of Cardiac Implantable Devices	Rosier, Arnaud; Mabo, Philippe; Temal, Lynda; van Hille, Pascal; Dameron, Olivier; Deleger, Louise; Grouin, Cyril; Zweigenbaum, Pierre; Jacques, Julie; Chazard, Emmanuel; Laporte, Laure; Henry, Christine; Burgun, Anita	2016	Ontology Driven Classification of the Alerts	Zeitschriftenaufsatz	Studies in Health Technology & Informatics (Studies in Health Technology & Informatics)	10.3233/978-1-61499-633-0-59	221		2021/04/02/15:10:50	59–63
Literatures Review of Telemedicine Services in Maritime and Extreme Weather	Woldaregay, Ashenafi Zebene; Walderhaug, Ståle; Hartvigsen, Gunnar	2016		Zeitschriftenaufsatz	International Journal of Integrated Care (IJIC) (International Journal of Integrated Care (IJIC))	10.5334/ijic.2597	16	5 Supplement	2021/04/02/15:09:54	1–2
Screening high school students in Italy for sudden cardiac death prevention by using a telecardiology device	Lazzari, Claudio de; Genuini, Igino; Gatto, Maria C.; Cinque, Alessandra; Mancone, Massimo; D’Ambrosi, Alessandra; Silvetti, Elisa; Fusto, Antonio; Pisanelli, Domenico M.; Fedele, Francesco; D'Ambrosi, Alessandra	2017	A retrospective observational study	Zeitschriftenaufsatz	Cardiology in the Young (Cardiology in the Young)	10.1017/S1047951116000147	27	1	2021/04/02/15:09:57	74–81
Electrocardiograms of Children and Adolescents Practicing Non-competitive Sports	Molinari, Giuseppe; Brunetti, Natale; Biasco, Luigi; Squarcia, Sandro; Cristoforetti, Yvonne; Bennicelli, Riccardo; Vecchio, Cecilia; Viacava, Cecilia; Giustetto, Carla; Gaita, Fiorenzo	2017	Normal Limits and Abnormal Findings in a Large European Cohort Evaluated by Telecardiology	Zeitschriftenaufsatz	Sports Medicine (Sports Medicine)	10.1007/s40279-016-0609-7	47	3	2021/04/02/15:10:49	555–563
Telemedicine in Pediatric Cardiology	Satou, Gary M.; Rheuban, Karen; Alverson, Dale; Lewin, Mark; Mahnke, Christopher; Marcin, James; Martin, Gerard R.; Mazur, Lisa Schmitz; Sahn, David J.; Shah, Sanket; Tuckson, Reed; Webb, Catherine L.; Sable, Craig A.	2017	A Scientific Statement From the American Heart Association	Zeitschriftenaufsatz	Circulation (Circulation)	10.1161/CIR.0000000000000478	135	11	2021/04/02/15:09:55	e648-e678
Dictionary-based monitoring of premature ventricular contractions	Bollepalli, S. Chandra; Challa, S. Sastry; Anumandla, Laxminarayana; Jana, Soumya	2018	An ultra-low-cost point-of-care service	Zeitschriftenaufsatz	Artificial Intelligence in Medicine (Artificial Intelligence in Medicine)	10.1016/j.artmed.2018.04.003	87		2021/04/02/15:10:47	91–104
Telecardiology and its settings of application	Molinari, Giuseppe; Molinari, Martina; Di Biase, Matteo; Brunetti, Natale D.	2018	An update	Zeitschriftenaufsatz	Journal of Telemedicine & Telecare (Journal of Telemedicine & Telecare)	10.1177/1357633X16689432	24	5	2021/04/02/15:09:53	373–381
Rozwiązania telemedyczne w kardiologii - opinia ekspertów Komisji Informatyki i Telemedycyny Polskiego Towarzystwa Kardiologicznego, Sekcji Elektrokardiologii Nieinwazyjnej i Telemedycyny Polskiego Towarzystwa Kardiologicznego oraz Komitetu Nauk Klinicznych Polskiej Akademii Nauk	Piotrowicz, Ryszard; Krzesiński, Paweł; Balsam, Paweł; Kempa, Maciej; Główczyńska, Renata; Grabowski, Marcin; Kołtowski, Łukasz; Lewicka, Ewa; Peller, Michał; Piotrowicz, Ewa; Podolec, Jakub; Stańczyk, Adam; Zajdel, Justyna; Opolski, Grzegorz	2018		Zeitschriftenaufsatz	Polish Heart Journal / Kardiologia Polska (Polish Heart Journal / Kardiologia Polska)	10.5603/KP.a2018.0058	76	3	2021/04/02/15:10:47	698–707
Risk Stratification of Fetal Cardiac Anomalies in an Underserved Population Using Telecardiology	Cuneo, Bettina F.; Olson, Christina A.; Haxel, Caitlin; Howley, Lisa; Gagnon, Amy; Benson, D. Woodrow; Kaizer, Alexander M.; Thomas, J. Fred	2019		Zeitschriftenaufsatz	Obstetrics & Gynecology (Obstetrics & Gynecology)	10.1097/AOG.0000000000003502	134	5	2021/04/02/15:09:58	1096–1103
How to develop a sustainable telemedicine service? A Pediatric Telecardiology Service 20 years on - an exploratory study	Maia, Mélanie Raimundo; Castela, Eduardo; Pires, António; Lapão, Luís Velez	2019		Zeitschriftenaufsatz	BMC Health Services Research (BMC Health Services Research)	10.1186/s12913-019-4511-5	19	1	2021/04/02/15:09:55	N.PAG-N.PAG
Evaluation of nurse's performance in telemedicine	Queiroz de Souza, Claudinalle Farias; Gonçalo Oliveira, Dulcinei de; da Silva Santana, Alef Diogo; Mulatinho, Leticia Moura; Cardoso, Mirian Domingos; Ferreira Pereira, Emanuela Batista; Aquino, Jael Maria de	2019		Zeitschriftenaufsatz	Revista Brasileira de Enfermagem (Revista Brasileira de Enfermagem)	10.1590/0034-7167-2018-0313	72	4	2021/04/02/15:10:47	933–939
Impact of different models of improvement of continuity of care on lipid control and the delay of visits to cardiology	Cosin-Sales, Juan; Freixa, Roman; Bravo, Marisol; Ruvira, Jorge; Gràcia, Pere Blanch; Calvo Iglesias, Francisco Eugenio; Escobar, Carlos	2020		Zeitschriftenaufsatz	Future Cardiol (Future Cardiology)	10.2217/fca-2018-0083	16	1	2021/04/02/15:10:49	33–41
Acceptance and feasibility for handheld Tele-ECG	Davalagi, Shubha; Palicheralu, Balu; Murthy, Sanjana; Kashyup, Manisha	2020		Zeitschriftenaufsatz	Indian Journal of Community Health (Indian Journal of Community Health)	10.47203/ijch.2020.v32i03.022	32	3	2021/04/02/15:10:48	586–589
The impact of telecardiology on the outcome of patients with myocardial infarction transported by Tehran's emergency medical services to selected hospitals of Tehran city	Janbazloufar, Kamran Mohammadi; Pazokian, Marzieh; Safari, Mehdi; Saberian, Peyman; Nasiri, Maliheh	2020		Zeitschriftenaufsatz	Nursing Practice Today (Nursing Practice Today)		7	1	2021/04/02/15:09:55	72–80
Mobile, Cloud, and Big Data Computing	Hsieh, Jui-Chien; Li, Ai-Hsien; Yang, Chung-Chi	2013	Contributions, Challenges, and New Directions in Telecardiology	Zeitschriftenaufsatz	Int. J. Environ. Res. Public Health (International Journal of Environmental Research and Public Health)	10.3390/ijerph10116131	10	11	2013/11	6131–6153
WE-CARE	Huang, Anpeng; Chen, Chao; Bian, Kaigui; Duan, Xiaohui; Chen, Min; Gao, Hongqiao; Meng, Chao; Zheng, Qian; Zhang, Yingrui; Jiao, Bingli; Xie, Linzhen	2014	An Intelligent Mobile Telecardiology System to Enable mHealth Applications	Zeitschriftenaufsatz	IEEE J. Biomed. Health Inform. (Ieee Journal of Biomedical and Health Informatics)	10.1109/JBHI.2013.2279136	18	2	2014/03	693–702
Digital Health Interventions for the Prevention of Cardiovascular Disease	Widmer, R. Jay; Collins, Nerissa M.; Collins, C. Scott; West, Colin P.; Lerman, Lilach O.; Lerman, Amir	2015	A Systematic Review and Meta-analysis	Zeitschriftenaufsatz	Mayo Clin. Proc. (Mayo Clinic Proceedings)	10.1016/j.mayocp.2014.12.026	90	4	2015/04	469–480
A coordinated PCP-Cardiologist Telemedicine Model (PCTM) in China's community hypertension care	Xu, Lei; Fang, Wei-Yi; Zhu, Fu; Zhang, Hong-Guang; Liu, Kai	2017	Study protocol for a randomized controlled trial	Zeitschriftenaufsatz	Trials (Trials)	10.1186/s13063-017-1970-z	18		2017/05/25	236
Non-contact Quantification of Jugular Venous Pulse Waveforms from Skin Displacements	Tang, Emily J. Lam Po; HajiRassouliha, Amir; Nash, Martyn P.; Nielsen, Poul M. F.; Taberner, Andrew J.; Cakmak, Yusuf O.	2018		Zeitschriftenaufsatz	Sci Rep (Scientific Reports)	10.1038/s41598-018-35483-4	8		2018/11/22	17236
Methods of usability testing in the development of eHealth applications	Maramba, Inocencio; Chatterjee, Arunangsu; Newman, Craig	2019	A scoping review	Zeitschriftenaufsatz	Int. J. Med. Inform. (International Journal of Medical Informatics)	10.1016/j.ijmedinf.2019.03.018	126		2019/06	95–104
Wavelet-based ECG and PCG signals compression technique for mobile telemedicine	Manikandan, M. S.; Dandapat, S.	2007		Tagungsband		10.1109/adcom.2007.29
A cardiod based technique to identify Cardiovascular Diseases using mobile phones and body sensors	Sufi, F.; Khalil, I.; Tari, Z.	2010		Tagungsband		10.1109/IEMBS.2010.5626578
WE-CARE	Chen, C.; Bian, K.; Huang, A.; Duan, X.; Gao, H.; Jiao, B.; Xie, L.; Wang, S.	2013	A wearable efficient telecardiology system using mobile 7-lead ECG devices	Tagungsband		10.1109/ICC.2013.6655252
System Light-Loading Technology for mHealth	Huang, A.; Xu, W.; Li, Z.; Xie, L.; Sarrafzadeh, M.; Li, X.; Cong, J.	2014	Manifold-Learning-Based Medical Data Cleansing and Clinical Trials in WE-CARE Project	Zeitschriftenaufsatz	IEEE J. Biomed. Health Inform. (Ieee Journal of Biomedical and Health Informatics)	10.1109/JBHI.2013.2292576	18	5	2014	1581–1589
Implementation of telemedicine ECG system based on bluetooth android device	Do, H. N.; Vo, M.-T.; Ho, T. D.; Nguyen, T.-T.	2015		Tagungsband		10.1007/978-3-319-11776-8_27	46
Telemedicine in cardiology - Perspectives in Bosnia and Herzegovina	Naser, N.; Tandir, S.; Begic, E.	2017		Zeitschriftenaufsatz	Acta Informatica Medica	10.5455/aim.2017.25.263-266	25	4	2017	263–266
Augmented reality for supporting real time telementoring	Del Rio, M.; Meloni, V.; Frexia, F.; Cabras, F.; Tumbarello, R.; Montis, S.; Marini, A.; Zanetti, G.	2018	An exploratory study applied to ultrasonography	Tagungsband		10.1145/3239438.3239444
Medication Management Companion (MMC) for a rural kenyan community	Oduor, E.; Nyota, T.; Wachira, C.; Osebe, S.; Remy, S. L.; Walcott, A.	2018		Tagungsband		10.1145/3272973.3274041
An effective patient monitoring system using IOT	Premalatha, G.; Thulasibai, D. V.	2018		Tagungsband		10.1109/AEEICB.2018.8480975
Live demonstration	Lin, Y.-J.; Chuang, C.-W.; Yen, C.-Y.; Huang, S.-H.; Chen, J.-Y.; Lee, S.-Y.	2019	An aiot wearable ecg patch with decision tree for arrhythmia analysis	Tagungsband		10.1109/BIOCAS.2019.8919138
Connected Health in Hypertension Management	Omboni, S.	2019		Zeitschriftenaufsatz	Frontiers in Cardiovascular Medicine	10.3389/fcvm.2019.00076	6		2019
Which app is right for my CVD patient?	Gabizon, I.; Bhagirath, V.; Lokker, C.	2020		Zeitschriftenaufsatz	Heart and Metabolism			82	2020	17–20
Evaluation of mhealth applications related to cardiovascular diseases	Villarreal, V.; Berbey-Alvarez, A.	2020	A systematic review	Zeitschriftenaufsatz	Acta Informatica Medica		28	2	2020	130–137
Compare the Effects of Telemedicine Approach With Usual Care in Hypertension Management in China	NCT02919033	2016		Zeitschriftenaufsatz	https://clinicaltrials.gov/show/NCT02919033
Mobile App and Digital System for Patients After Myocardial Infarction	NCT04793425	2021		Zeitschriftenaufsatz	https://clinicaltrials.gov/show/NCT04793425

## Sheet: Excluded Articles
Titel	Author, editor or institution	Year	Subtitle	App	Wearable	Other Sensors	Consumer Health Devices	Primary Study/ Publication
Development of a mobile phone-based intervention to improve adherence to secondary prevention of coronary heart disease in China	Chen, Shu; Gong, Enying; Kazi, Dhruv S.; Gates, Ann B.; Karaye, Kamilu Musa; Girerd, Nicolas; Bai, Rong; AlHabib, Khalid F.; Li, Chaoyun; Sun, Kelly; Hong, Louisa; Fu, Hua; Peng, Weixia; Liu, Xianxia; Chen, Lei; Schwalm, J.-D.; Yan, Lijing L.	2016		Yes	No	No	No	Yes		No wearable & Sensors	6
Design and Implementation of a Telecardiology System for Mobile Devices	Cinaglia, Pietro; Tradigo, Giuseppe; Guzzi, Pietro H.; Veltri, Pierangelo	2015		Yes	No	No	No	Yes		No consumer health devices	1
A Hospital-Community-Family-Based Telehealth Program for Patients With Chronic Heart Failure	Guo, Xiaorong; Gu, Xiang; Jiang, Jiang; Li, Hongxiao; Duan, Ruoyu; Zhang, Yi; Sun, Lei; Bao, Zhengyu; Shen, Jianhua; Chen, Fukun	2019	Single-Arm, Prospective Feasibility Study	Yes	No	Yes	No	Yes		No primary study	6
Mobile health technology-supported atrial fibrillation screening and integrated care	Guo, Yutao; Guo, Jun; Shi, Xiangmin; Yao, Yuan; Sun, Yihong; Xia, Yunlong; Yu, Bo; Liu, Tong; Chen, Yundai; Lip, Gregory Y. H.; Investigators, mAF-App Trial [II]	2020	A report from the mAFA-II trial Long-term Extension Cohort	Yes	Yes	No	Yes	No		No App	4
On-demand mobile health infrastructures to allow comprehensive remote atrial fibrillation and risk factor management through teleconsultation	Hermans, Astrid N. L.; van der Velden, Rachel M. J.; Gawalko, Monika; Verhaert, Dominique V. M.; Desteghe, Lien; Duncker, David; Manninger, Martin; Heidbuchel, Hein; Pisters, Ron; Hemels, Martin; Pison, Laurent; Sohaib, Afzal; Sultan, Arian; Steven, Daniel; Wijtvliet, Petra; Tieleman, Robert; Gupta, Dhiraj; Dobrev, Dobromir; Svennberg, Emma; Crijns, Harry J. G. M.; Pluymaekers, Nikki A. H. A.; He…	2020		Yes	Yes	Yes	Yes	No			17
WE-CARE	Huang, Anpeng; Chen, Chao; Bian, Kaigui; Duan, Xiaohui; Chen, Min; Gao, Hongqiao; Meng, Chao; Zheng, Qian; Zhang, Yingrui; Jiao, Bingli; Xie, Linzhen	2014	An Intelligent Mobile Telecardiology System to Enable mHealth Applications	No	No	Yes	No	Yes
Preparing India to Leverage Power of Mobile Technology	Jain, Yojna Sah; Garg, Arun; Jhamb, D. K.; Jain, Praful; Karar, Akash	2019	Development of a Bilingual Mobile Health Tool for Heart Patients	Yes	No	No	No	Yes
How to develop a sustainable telemedicine service? A Pediatric Telecardiology Service 20 years on - an exploratory study	Maia, Mélanie Raimundo; Castela, Eduardo; Pires, António; Lapão, Luís Velez	2019		No	No	No	No	Yes
Feasibility of Obtaining Measures of Lifestyle From a Smartphone App	McConnell, Michael V.; Shcherbina, Anna; Pavlovic, Aleksandra; Homburger, Julian R.; Goldfeder, Rachel L.; Waggot, Daryl; Cho, Mildred K.; Rosenberger, Mary E.; Haskell, William L.; Myers, Jonathan; Champagne, Mary Ann; Mignot, Emmanuel; Landray, Martin; Tarassenko, Lionel; Harrington, Robert A.; Yeung, Alan C.; Ashley, Euan A.	2017	The MyHeart Counts Cardiovascular Health Study	Yes	No	No	No	Yes
Telecardiology and its settings of application	Molinari, Giuseppe; Molinari, Martina; Di Biase, Matteo; Brunetti, Natale D.	2018	An update	No	No	No	No	No
Connected Health in Hypertension Management	Omboni, S.	2019		Yes	Yes	Yes	Yes	No
Implementation of an on-demand app-based heart rate and rhythm monitoring infrastructure for the management of atrial fibrillation through teleconsultation	Pluymaekers, Nikki A. H. A.; Hermans, Astrid N. L.; van der Velden, Rachel M. J.; Gawałko, Monika; den Uijl, Dennis W.; Buskes, Saskia; Vernooy, Kevin; Crijns, Harry J. G. M.; Hendriks, Jeroen M.; Linz, Dominik	2021	TeleCheck-AF	Yes	No	No	No	Yes
An effective patient monitoring system using IOT	Premalatha, G.; Thulasibai, D. V.	2018		Yes	No	No	No	Yes
Chronic heart failure home-based management with a telecardiology system	S, Scalvini; E, Zanelli; L, Paletta; M, Benigno; D, Domeneghini; F, Giuli de; A, Giordano; F, Glisenti	2006	A comparison between patients followed by general practitioners and by a cardiology department	No	No	No	No	Yes
Technical Guidance for Clinicians Interested in Partnering With Engineers in Mobile Health Development and Evaluation	Shah, Lochan M.; Yang, William E.; Demo, Ryan C.; Lee, Matthias A.; Weng, Daniel; Shan, Rongzi; Wongvibulsin, Shannon; Spaulding, Erin M.; Marvel, Francoise A.; Martin, Seth S.	2019		Yes	Yes	Yes	Yes	No
Mobile health in cardiology	Treskes, Roderick Willem; van der Velde, Enno Tjeerd; Barendse, Rogier; Bruining, Nico	2016	A review of currently available medical apps and equipment for remote monitoring	Yes	Yes	Yes	Yes	No
Evaluation of mhealth applications related to cardiovascular diseases	Villarreal, V.; Berbey-Alvarez, A.	2020	A systematic review	Yes	Yes	Yes	Yes	No

## Sheet: Categorization of PROMs
Additional Table. Overview of the categories of PROMs in the systematic review.
Category	PROMs
Measure functional status	(1) Self-rated health status (scale range one to five) [18]
	(2) Physical activity index (FHS) [13]
Health related quality of life	(1) Minnesota Living with Heart Failure Questionnaire (MLHFQ) [17,18]
	(2) Kansas City Cardiomyopathy Questionnaire (KCCQ) [15,17]
	(3) 5-level EQ-5D (EQ-5D-5L) [15]
Symptom and symptom burden	(1) Shortness of breath scale [15]
	(2) Patient-reported thromboembolism of bleeding events [11]
	(3) AF symptom assessment scale from the European Hearth Rhythm Association (EHRA) [11]
Personal experience of care	(1) Self-Care of Heart Failure Index (SCHFI) [15]
Health-related behaviors such as anxiety and depression	(1) Patient Health Questionnaire Depression Scale (PHQ-9) [17]
	(2) Cardiac Anxiety Questionnaire (CAQ) [17]
	(3) Perceived Stress Scale Survey [14]
	(4) Center for Epidemiologic Studies
	Depression Scale, (CES-D) [13]
Others	(1) eHealth literacy (questionnaire similar to the eHealth Literacy Scale) [17]
	(2) (1) Individualized Questionnaires (e.g. for medication adherence in case of missing BP measurements) [13]
