# Supplementary material for: Telemonitoring of Real-World Health Data in Cardiology: A Systematic Review
Source: Preprints.org preprint supplement (doi:10.20944/preprints202107.0702.v1), 2021-07-30
Supplement: Supplementary file 3 [file SM_Table2_Excluded Articles.xlsx]

## Sheet: Excluded Articles
Titel	Author, editor or institution	Year	Subtitle	App	Wearable	Other Sensors	Consumer Health Devices	Primary Study/ Publication
Development of a mobile phone-based intervention to improve adherence to secondary prevention of coronary heart disease in China	Chen, Shu; Gong, Enying; Kazi, Dhruv S.; Gates, Ann B.; Karaye, Kamilu Musa; Girerd, Nicolas; Bai, Rong; AlHabib, Khalid F.; Li, Chaoyun; Sun, Kelly; Hong, Louisa; Fu, Hua; Peng, Weixia; Liu, Xianxia; Chen, Lei; Schwalm, J.-D.; Yan, Lijing L.	2016		Yes	No	No	No	Yes		No wearable & Sensors	6
Design and Implementation of a Telecardiology System for Mobile Devices	Cinaglia, Pietro; Tradigo, Giuseppe; Guzzi, Pietro H.; Veltri, Pierangelo	2015		Yes	No	No	No	Yes		No consumer health devices	1
A Hospital-Community-Family-Based Telehealth Program for Patients With Chronic Heart Failure	Guo, Xiaorong; Gu, Xiang; Jiang, Jiang; Li, Hongxiao; Duan, Ruoyu; Zhang, Yi; Sun, Lei; Bao, Zhengyu; Shen, Jianhua; Chen, Fukun	2019	Single-Arm, Prospective Feasibility Study	Yes	No	Yes	No	Yes		No primary study	6
Mobile health technology-supported atrial fibrillation screening and integrated care	Guo, Yutao; Guo, Jun; Shi, Xiangmin; Yao, Yuan; Sun, Yihong; Xia, Yunlong; Yu, Bo; Liu, Tong; Chen, Yundai; Lip, Gregory Y. H.; Investigators, mAF-App Trial [II]	2020	A report from the mAFA-II trial Long-term Extension Cohort	Yes	Yes	No	Yes	No		No App	4
On-demand mobile health infrastructures to allow comprehensive remote atrial fibrillation and risk factor management through teleconsultation	Hermans, Astrid N. L.; van der Velden, Rachel M. J.; Gawalko, Monika; Verhaert, Dominique V. M.; Desteghe, Lien; Duncker, David; Manninger, Martin; Heidbuchel, Hein; Pisters, Ron; Hemels, Martin; Pison, Laurent; Sohaib, Afzal; Sultan, Arian; Steven, Daniel; Wijtvliet, Petra; Tieleman, Robert; Gupta, Dhiraj; Dobrev, Dobromir; Svennberg, Emma; Crijns, Harry J. G. M.; Pluymaekers, Nikki A. H. A.; He…	2020		Yes	Yes	Yes	Yes	No			17
WE-CARE	Huang, Anpeng; Chen, Chao; Bian, Kaigui; Duan, Xiaohui; Chen, Min; Gao, Hongqiao; Meng, Chao; Zheng, Qian; Zhang, Yingrui; Jiao, Bingli; Xie, Linzhen	2014	An Intelligent Mobile Telecardiology System to Enable mHealth Applications	No	No	Yes	No	Yes
Preparing India to Leverage Power of Mobile Technology	Jain, Yojna Sah; Garg, Arun; Jhamb, D. K.; Jain, Praful; Karar, Akash	2019	Development of a Bilingual Mobile Health Tool for Heart Patients	Yes	No	No	No	Yes
How to develop a sustainable telemedicine service? A Pediatric Telecardiology Service 20 years on - an exploratory study	Maia, Mélanie Raimundo; Castela, Eduardo; Pires, António; Lapão, Luís Velez	2019		No	No	No	No	Yes
Feasibility of Obtaining Measures of Lifestyle From a Smartphone App	McConnell, Michael V.; Shcherbina, Anna; Pavlovic, Aleksandra; Homburger, Julian R.; Goldfeder, Rachel L.; Waggot, Daryl; Cho, Mildred K.; Rosenberger, Mary E.; Haskell, William L.; Myers, Jonathan; Champagne, Mary Ann; Mignot, Emmanuel; Landray, Martin; Tarassenko, Lionel; Harrington, Robert A.; Yeung, Alan C.; Ashley, Euan A.	2017	The MyHeart Counts Cardiovascular Health Study	Yes	No	No	No	Yes
Telecardiology and its settings of application	Molinari, Giuseppe; Molinari, Martina; Di Biase, Matteo; Brunetti, Natale D.	2018	An update	No	No	No	No	No
Connected Health in Hypertension Management	Omboni, S.	2019		Yes	Yes	Yes	Yes	No
Implementation of an on-demand app-based heart rate and rhythm monitoring infrastructure for the management of atrial fibrillation through teleconsultation	Pluymaekers, Nikki A. H. A.; Hermans, Astrid N. L.; van der Velden, Rachel M. J.; Gawałko, Monika; den Uijl, Dennis W.; Buskes, Saskia; Vernooy, Kevin; Crijns, Harry J. G. M.; Hendriks, Jeroen M.; Linz, Dominik	2021	TeleCheck-AF	Yes	No	No	No	Yes
An effective patient monitoring system using IOT	Premalatha, G.; Thulasibai, D. V.	2018		Yes	No	No	No	Yes
Chronic heart failure home-based management with a telecardiology system	S, Scalvini; E, Zanelli; L, Paletta; M, Benigno; D, Domeneghini; F, Giuli de; A, Giordano; F, Glisenti	2006	A comparison between patients followed by general practitioners and by a cardiology department	No	No	No	No	Yes
Technical Guidance for Clinicians Interested in Partnering With Engineers in Mobile Health Development and Evaluation	Shah, Lochan M.; Yang, William E.; Demo, Ryan C.; Lee, Matthias A.; Weng, Daniel; Shan, Rongzi; Wongvibulsin, Shannon; Spaulding, Erin M.; Marvel, Francoise A.; Martin, Seth S.	2019		Yes	Yes	Yes	Yes	No
Mobile health in cardiology	Treskes, Roderick Willem; van der Velde, Enno Tjeerd; Barendse, Rogier; Bruining, Nico	2016	A review of currently available medical apps and equipment for remote monitoring	Yes	Yes	Yes	Yes	No
Evaluation of mhealth applications related to cardiovascular diseases	Villarreal, V.; Berbey-Alvarez, A.	2020	A systematic review	Yes	Yes	Yes	Yes	No
