# Supplementary material for: Telemonitoring of Real-World Health Data in Cardiology: A Systematic Review
Source: Preprints.org preprint supplement (doi:10.20944/preprints202107.0702.v1), 2021-07-30
Supplement: Supplementary file 4 [file SM_Table3_Categorization_PROMs.xlsx]

## Sheet: Categorization of PROMs
Additional Table. Overview of the categories of PROMs in the systematic review.
Category	PROMs
Measure functional status	(1) Self-rated health status (scale range one to five) [18]
	(2) Physical activity index (FHS) [13]
Health related quality of life	(1) Minnesota Living with Heart Failure Questionnaire (MLHFQ) [17,18]
	(2) Kansas City Cardiomyopathy Questionnaire (KCCQ) [15,17]
	(3) 5-level EQ-5D (EQ-5D-5L) [15]
Symptom and symptom burden	(1) Shortness of breath scale [15]
	(2) Patient-reported thromboembolism of bleeding events [11]
	(3) AF symptom assessment scale from the European Hearth Rhythm Association (EHRA) [11]
Personal experience of care	(1) Self-Care of Heart Failure Index (SCHFI) [15]
Health-related behaviors such as anxiety and depression	(1) Patient Health Questionnaire Depression Scale (PHQ-9) [17]
	(2) Cardiac Anxiety Questionnaire (CAQ) [17]
	(3) Perceived Stress Scale Survey [14]
	(4) Center for Epidemiologic Studies
	Depression Scale, (CES-D) [13]
Others	(1) eHealth literacy (questionnaire similar to the eHealth Literacy Scale) [17]
	(2) (1) Individualized Questionnaires (e.g. for medication adherence in case of missing BP measurements) [13]
